# Supplementary material for: Structural molecular and developmental evidence for cell-type diversity in cnidarian mechanosensory neurons
Source: Research Square preprint supplement (doi:10.21203/rs.3.rs-4664512/v1), 2024-11-27
Supplement: Supplementary file 2 [file 438ad6fa331ae3ccd49764b1.xlsx]

## Sheet: Supplementary Figure 6
Supplementary Figure 6F - the dotted area denotes the gel image included in the manuscript. Remaining samples have not been included in this manuscript.

## Sheet: Supplementary Figure 9
Supplementary Figure 9C - raw data for a box plot showing the proportions of type I hair cells relative to type II hair cells immediately before photoconversion and 5 days after photoconversion.
		Pre-photoconversion	Replicate 1	Replicate 2	Replicate 3	Replicate 4	Replicate 5	Replicate 6	Replicate 7	Mean
		Type I	20	9	25	34	21	10	10	18.4286
		Type II	11	14	17	30	24	17	13	18
		Type I / Type II	1.81818	0.642857	1.47059	1.13333	0.875	0.588235	0.769231	1.04249
		5 days post-photoconversion	Replicate 1	Replicate 2	Replicate 3	Replicate 4	Replicate 5	Replicate 6	Mean
		Photoconverted type I	17	23	29	10	18	18	19.1667
		Photoconverted type II	26	15	20	14	22	21	19.6667
		Photoconverted Type I / Type II	0.653846	1.53333	1.45	0.714286	0.818182	0.857143	1.00446
